# Supplementary material for: IL-10 and IL-17 as Progression Markers of Syphilis in People Living with HIV: A Systematic Review
Source: MDPI journal article supplement (doi:10.3390/biom12101472), 2022-10-13

**Supplementary Table S1.** Systematic review of the immune response against *Treponema pallidum* subs *pallidum*.

| Syphilis  |                |                 |                             |                          |            |
|-----------|----------------|-----------------|-----------------------------|--------------------------|------------|
| Stage     | Cells involved | Response        | Cytokines/<br>Antibodies    | Transcription<br>Factors | References |
| Primary   | Th1            | High            | IFN- $\gamma$ / TNF         | STAT1 / T-bet            | [10,13,15] |
|           | Th2            | Low             | IL-4                        | GATA3                    | [13]       |
|           | Trex           | High            | IL-10 / TGF- $\beta$        | Foxp3                    | [9,13,18]  |
|           | Th17           | Low             | IL-17Ra                     | ROR- $\gamma$ t          | [9,24]     |
|           | Mo             | High            | --                          | --                       | [5,10]     |
|           | DC             | High            | --                          | --                       | [5,30,36]  |
| Secondary | NK             | High<br>(Skin)  | IFN- $\gamma$               | RORa/GATA3               | [5]        |
|           | Th1            | High            | IFN- $\gamma$ / TNF         | STAT1/T-bet              | [10,13,15] |
|           | Trex           | High            | IL-10 / TGF- $\beta$        | Foxp3                    | [13,9]     |
|           | CD8            | Low             | IFN- $\gamma$<br>Granzyme B | T-bet                    | [5,13]     |
|           | DC             | Low             | --                          | --                       | [5,30]     |
| Tertiary  | NK             | High<br>(blood) | IFN- $\gamma$               | RORa/GATA3               | [5]        |
|           | Th17           | High            | IL-17Ra                     | ROR- $\gamma$ t          | [18,24,30] |
|           | B              | High            | IgM / IgG                   | NFkb                     | [34,35]    |
|           | CD8            | High            | IFN- $\gamma$               | T-bet                    | [13]       |

**Supplementary Table S2.** Systematic review of the immune response in people living with HIV co-infected with *Treponema pallidum* subs *pallidum*.

| Syphilis in persons living with HIV |                        |                                            |                                                                                                                                                                                                       |            |
|-------------------------------------|------------------------|--------------------------------------------|-------------------------------------------------------------------------------------------------------------------------------------------------------------------------------------------------------|------------|
| Stage                               | Cells                  | Response                                   | Results                                                                                                                                                                                               | References |
| Primary                             | CD4                    | Low                                        | Decrease of 85% and 80% in people with ART and without ART respectively.<br><br>Primary co-infection was associated with an increase in IL-10. Both IL-10 and TNF decreased after syphilis treatment. | [22,23]    |
|                                     | T $\gamma\delta$       | High                                       | Greater number of IL-17 producing T $\gamma\delta$ cells and up to 8 times greater IFN- $\gamma$ production.                                                                                          | [24]       |
|                                     | T rex                  | High                                       | Greater number of Foxp3+Helios+CD25+ T rex compared with healthy donors.                                                                                                                              | [25]       |
|                                     | Intermediate Monocytes | High                                       | Higher antigen presentation HLA-DR.<br>Higher migration with CCR2 and CX3CR1 chemokines.                                                                                                              | [26]       |
| Secondary                           | CD4                    | No difference <i>versus</i> healthy donors | Nine times higher concentration of IL-10 was reported.                                                                                                                                                | [27]       |
| Tertiary                            | CD4                    | Low                                        | "Lymphopenia" as a predictor of neurosyphilis.                                                                                                                                                        | [28]       |

Supplementary Figure S1. Kinetics of the progression of Syphilis vs. HIV.

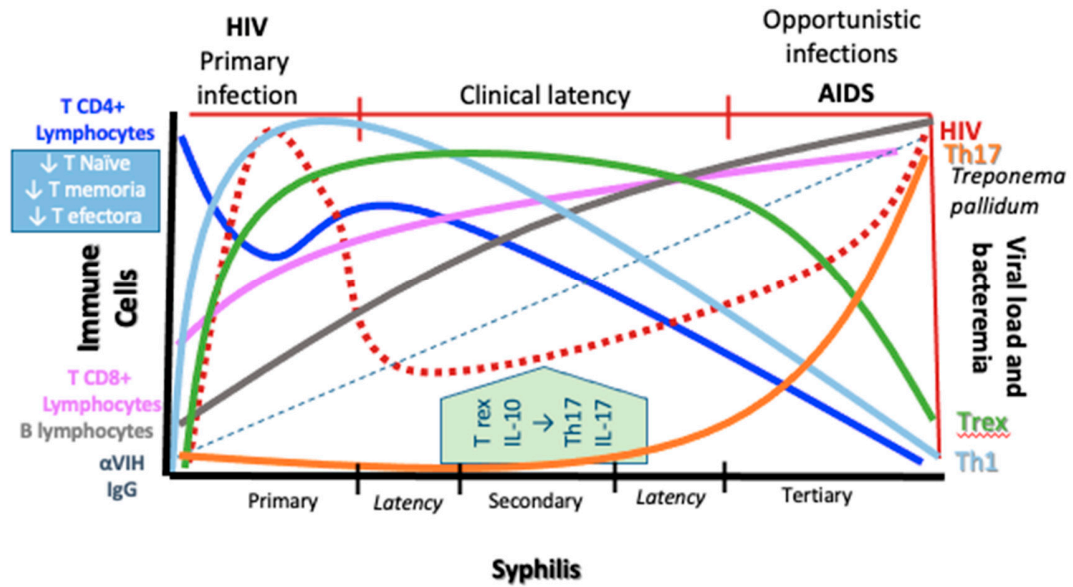

Supplement: s1 [file s1]
